# Supplementary material for: High energy Li-ion capacitors with conversion type Mn3O4particulates anchored to few layer graphene as the negative electrode
Source: Royal Society of Chemistry journal article supplement (doi:10.1039/c6ta05944a), 2016-01-01
Supplement: c6ta05944a1.pdf [file c6ta05944a1.pdf]

Supplementary information

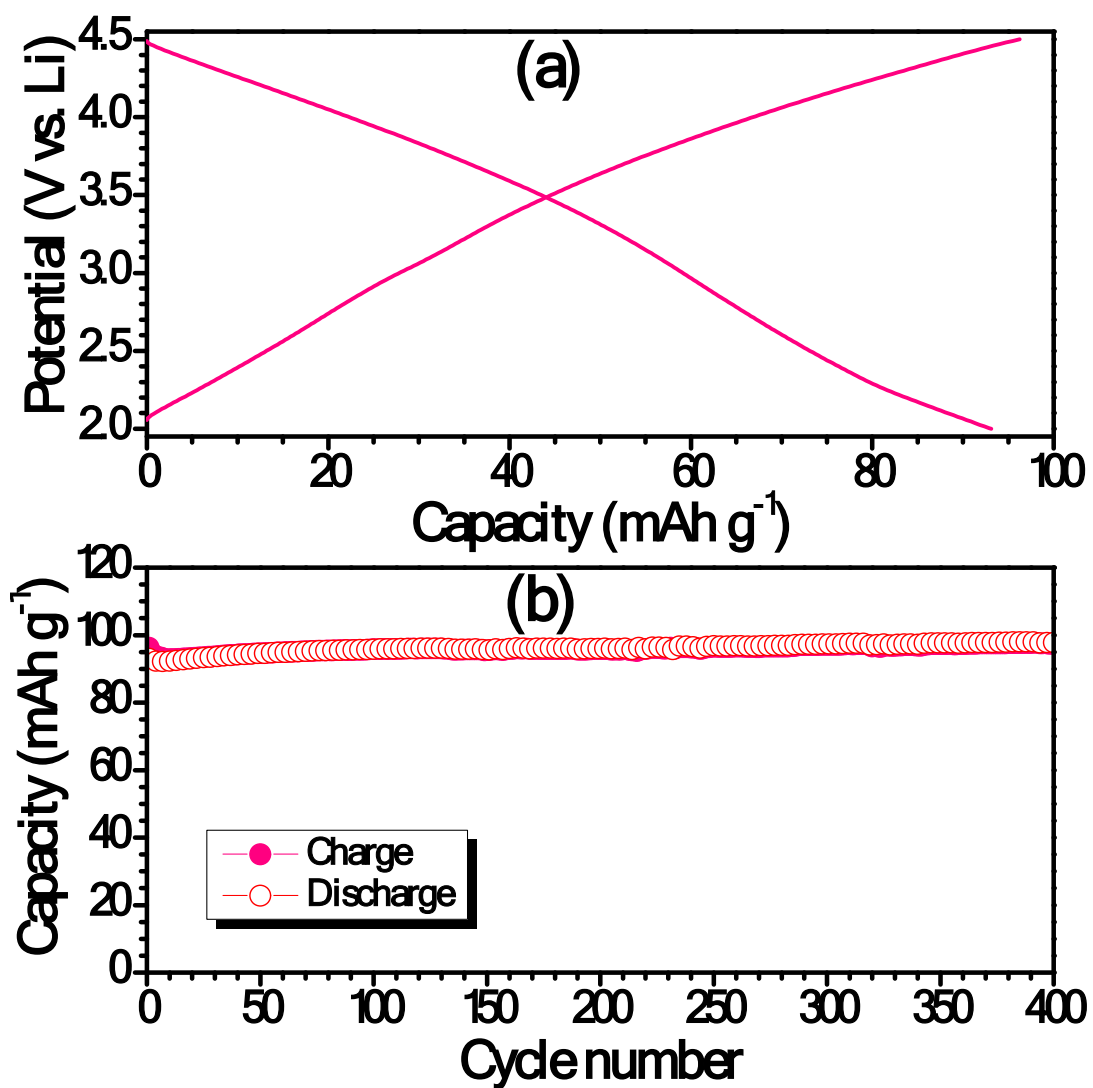

**Figure S1.** (a) Galvanostatic charge-discharge curves of AC (Kuraray, Japan) in half-cell configuration with Li at current density of 100 mA g<sup>-1</sup>, and (b) Plot of capacity vs. cycle number

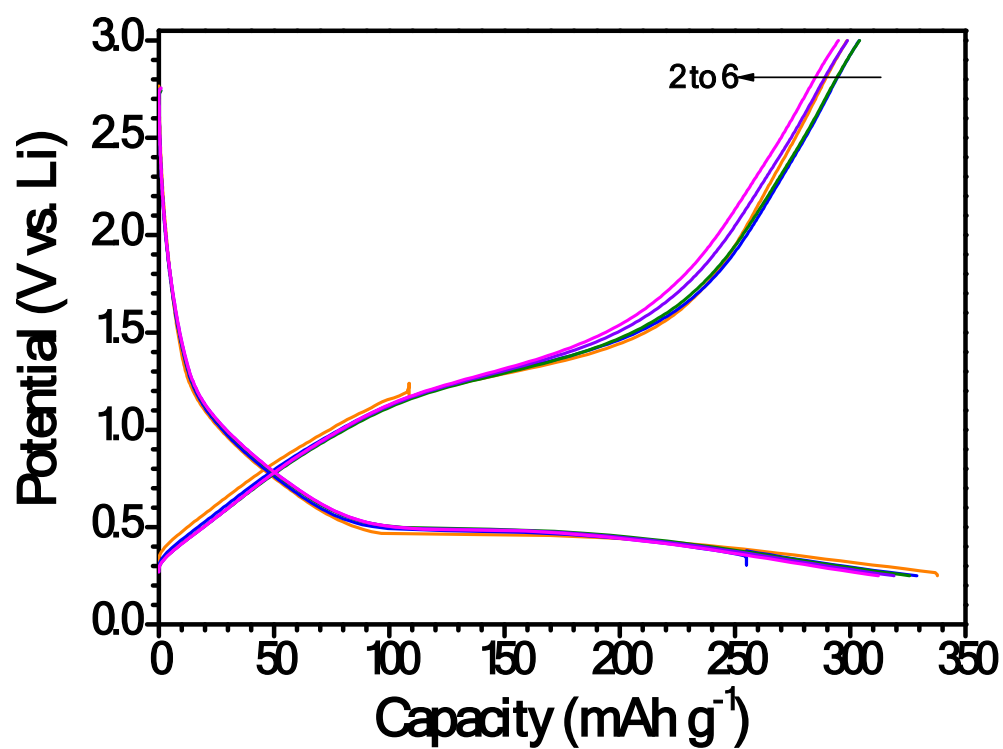

**Figure S2.** Typical galvanostatic charge-discharge curves of Mn<sub>3</sub>O<sub>4</sub>-G in half-cell configuration with Li at current density of 100 mA g<sup>-1</sup>.

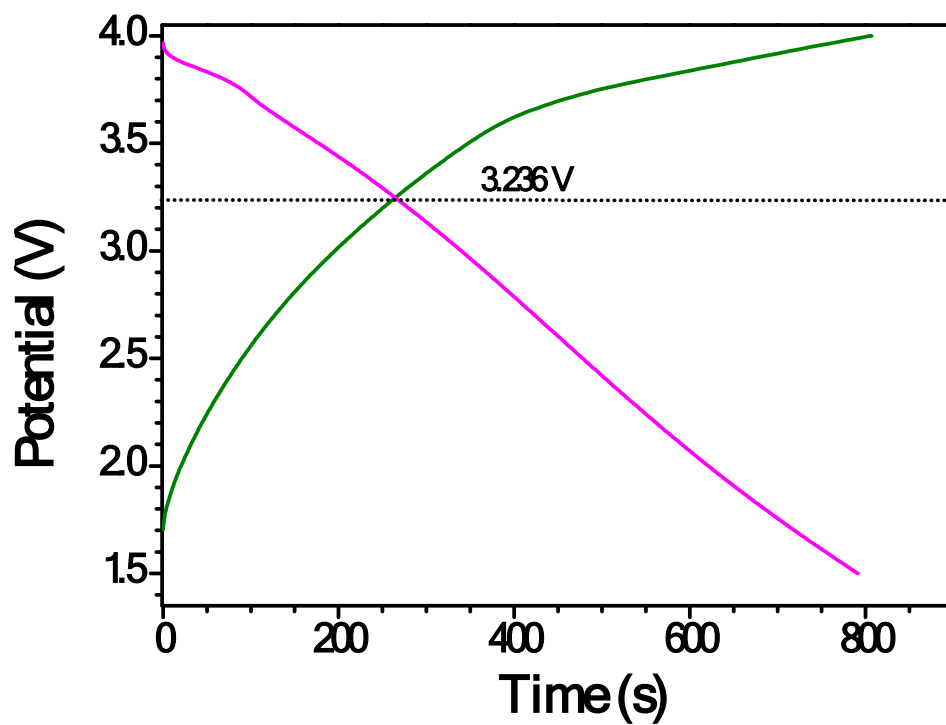

**Figure S3.** Typical charge-discharge curves of AC/Mn<sub>3</sub>O<sub>4</sub>-G based LIC at current density of 0.2 A g<sup>-1</sup>

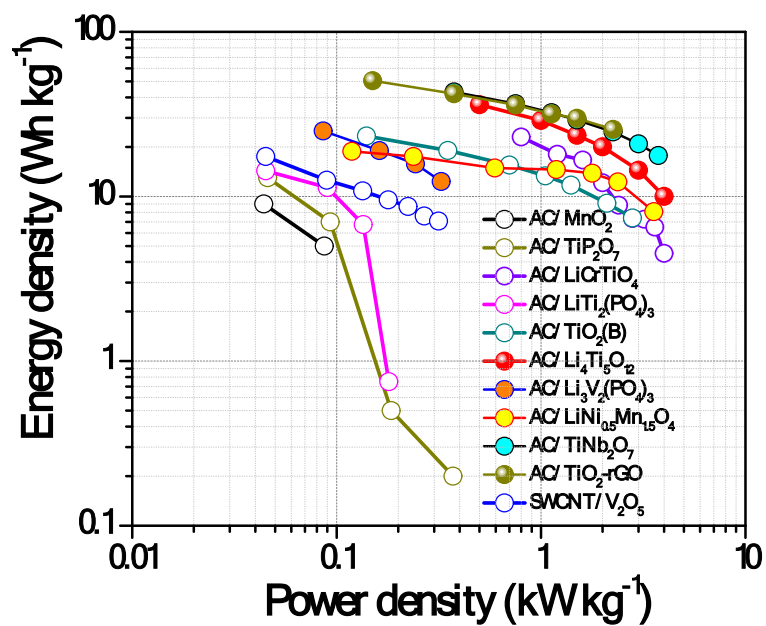

**Figure S4.** Ragone plot of various insertion type material investigated for LIC perspective. The given values are based on the total mass of the active material.

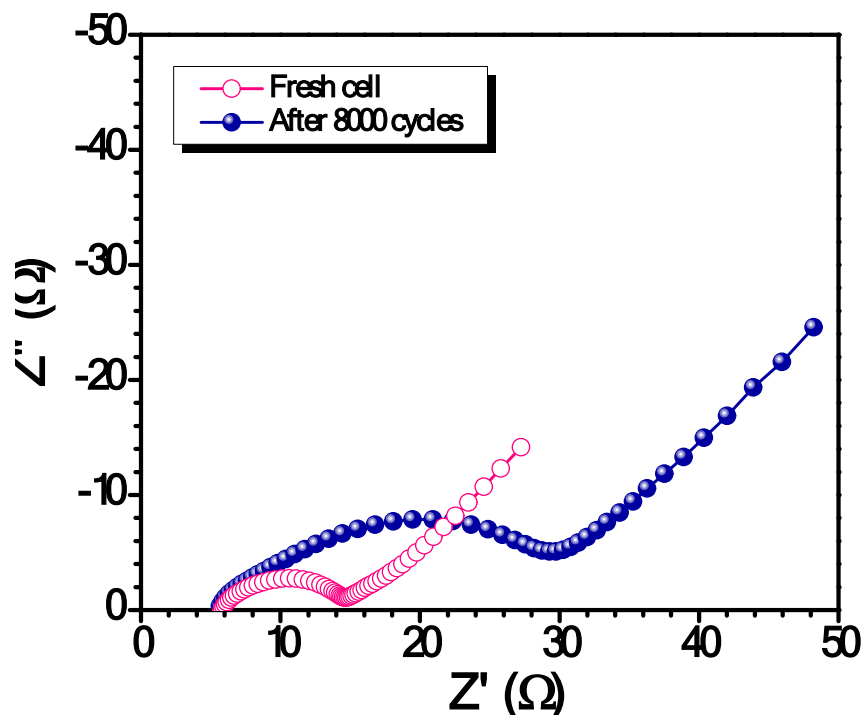

**Figure S5.** Electrochemical impedance spectra of AC/Mn<sub>3</sub>O<sub>4</sub>-G based LIC

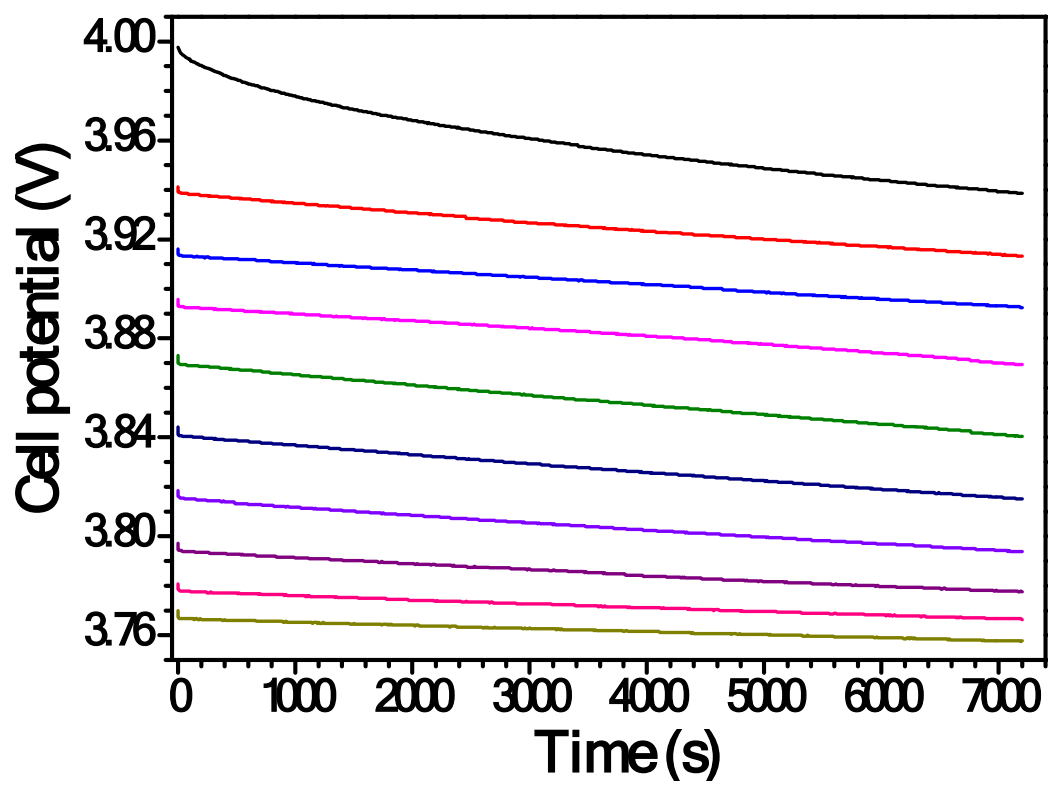

**Figure S6.** Plot of cell potential vs. relaxation time for AC/Mn<sub>3</sub>O<sub>4</sub>-G based LIC towards self-discharge measurements.

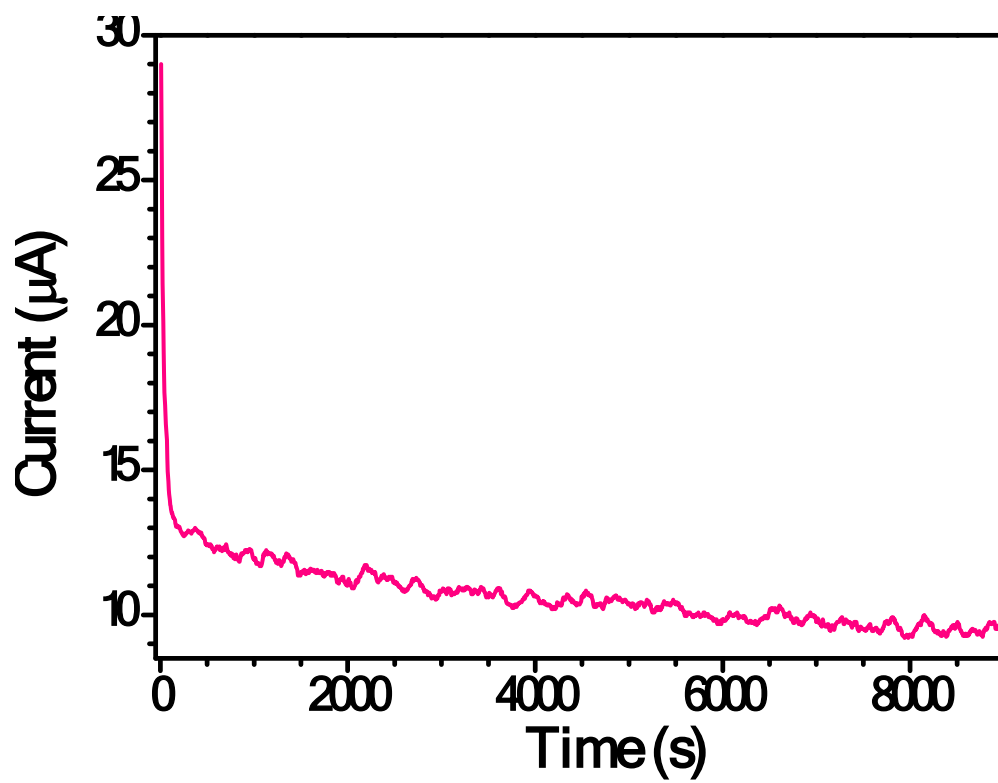

**Figure S7.** Plot of leakage current vs. time when the AC/Mn<sub>3</sub>O<sub>4</sub>-G based LIC is at 4 V.

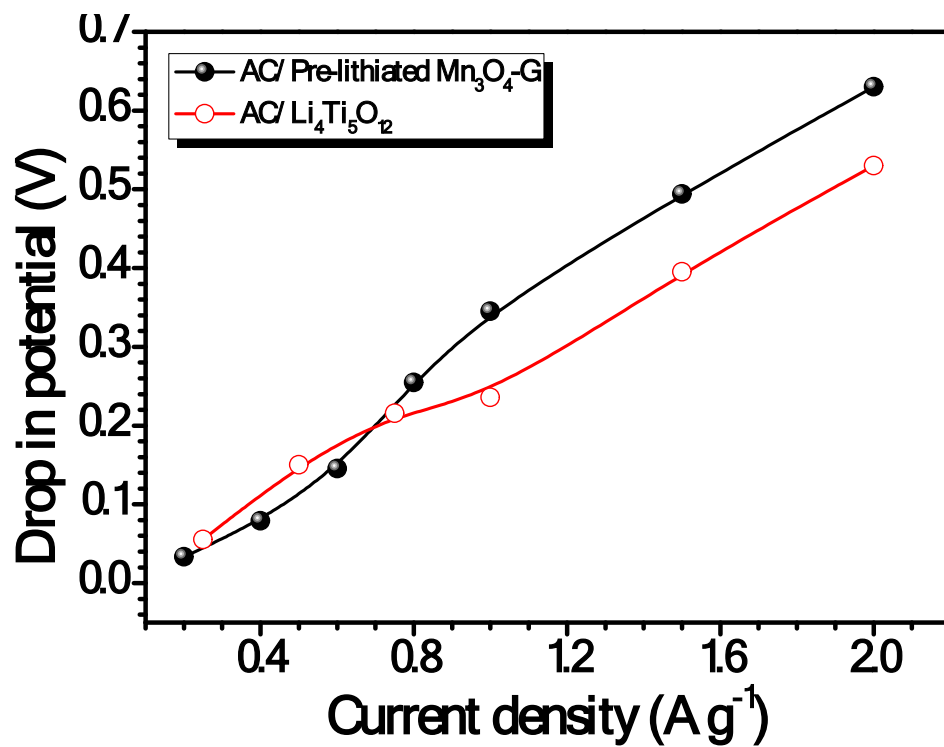

**Figure S8.** Comparison of IR drop observed in this system with intercalation anode based LIC (AC/Li<sub>4</sub>Ti<sub>5</sub>O<sub>12</sub>, Ref. 18)
